# Supplementary material for: Outcome after surgical stabilization of symptomatic rib fracture nonunion: a multicenter retrospective case series
Source: Springer Nature journal article supplement (doi:10.1007/s00068-021-01867-x), 2022-01-27
Supplement: MOESM1 [file 20072094]

## **Supplementary information**

**Title:** Outcome after surgical stabilization of symptomatic rib fracture nonunion; a multicenter retrospective case series

**Authors:** Suzanne F.M. Van Wijck<sup>1</sup>, MD, Esther M.M. Van Lieshout<sup>1</sup>, PhD MSc, Jonne T.H. Prins<sup>1</sup>, MD, Michael H.J. Verhofstad<sup>1</sup>, MD PhD, Pieter J. Van Huijstee<sup>3</sup>, MD, Jefrey Vermeulen<sup>2</sup>, MD PhD, Mathieu M.E. Wijffels<sup>1</sup>, MD PhD

### **Affiliations:**

<sup>1</sup>Trauma Research Unit Department of Surgery, Erasmus MC, University Medical Center Rotterdam, 3000 CA Rotterdam, The Netherlands

<sup>2</sup>Department of Surgery, Maasstad Ziekenhuis, 3007 AC Rotterdam, The Netherlands

<sup>3</sup>Department of Surgery, HagaZiekenhuis, Els Borst-Eilersplein 275, 2545 AA Den Haag, the Netherlands

### **Corresponding author:**

Dr. M.M.E. Wijffels

Mail: [m.wijffels@erasmusmc.nl](mailto:m.wijffels@erasmusmc.nl)

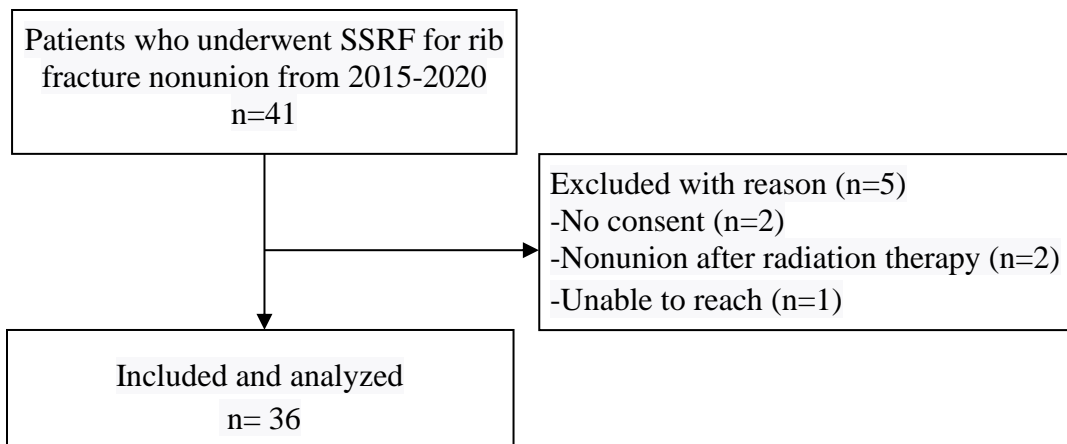

**Online Resource 1. Flowchart of the study**

SSRF, surgical stabilization of rib fracture.

**Online Resource 2. Pain level reported at follow-up during different activities before the rib fracture nonunion surgery for the affected and on the unaffected side, and pain level at follow-up for the affected side**

| Activity    | Level of pain | Before nonunion surgery |          |                 |          | After nonunion surgery at follow-up |          |
|-------------|---------------|-------------------------|----------|-----------------|----------|-------------------------------------|----------|
|             |               | Affected side           |          | Unaffected side |          | Affected side                       |          |
|             |               | N                       |          | N               |          | N                                   |          |
| Any         | No            | 36                      | 1 (3%)   | 36              | 26 (72%) | 36                                  | 4 (11%)  |
|             | Mild          |                         | 3 (8%)   |                 | 3 (8%)   |                                     | 13 (36%) |
|             | Moderate      |                         | 6 (17%)  |                 | 4 (11%)  |                                     | 6 (17%)  |
|             | Severe        |                         | 26 (72%) |                 | 3 (8%)   |                                     | 13 (36%) |
| Inspiration | No            | 36                      | 1 (3%)   | 35              | 27 (77%) | 36                                  | 12 (33%) |
|             | Mild          |                         | 8 (22%)  |                 | 4 (11%)  |                                     | 13 (36%) |
|             | Moderate      |                         | 6 (17%)  |                 | 2 (6%)   |                                     | 7 (19%)  |
|             | Severe        |                         | 21 (58%) |                 | 2 (6%)   |                                     | 4 (11%)  |
| Rest        | No            | 35                      | 2 (6%)   | 36              | 27 (75%) | 36                                  | 12 (33%) |
|             | Mild          |                         | 10 (29%) |                 | 4 (11%)  |                                     | 14 (39%) |
|             | Moderate      |                         | 6 (17%)  |                 | 4 (11%)  |                                     | 8 (22%)  |

|              |          |    |          |    |          |    |          |
|--------------|----------|----|----------|----|----------|----|----------|
|              | Severe   |    | 17 (49%) |    | 1 (3%)   |    | 2 (6%)   |
| Sleep        | No       | 36 | 2 (6%)   | 36 | 28 (78%) | 36 | 10 (28%) |
|              | Mild     |    | 8 (22%)  |    | 2 (6%)   |    | 10 (28%) |
|              | Moderate |    | 5 (14%)  |    | 4 (11%)  |    | 13 (36%) |
|              | Severe   |    | 21 (58%) |    | 2 (6%)   |    | 3 (8%)   |
| Pressure     | No       | 36 | 2 (6%)   | 35 | 28 (80%) | 36 | 8 (22%)  |
|              | Mild     |    | 5 (14%)  |    | 2 (6%)   |    | 14 (39%) |
|              | Moderate |    | 6 (17%)  |    | 2 (6%)   |    | 7 (19%)  |
|              | Severe   |    | 23 (64%) |    | 3 (9%)   |    | 7 (19%)  |
| Housekeeping | No       | 30 | 2 (7%)   | 33 | 26 (79%) | 33 | 9 (27%)  |
|              | Mild     |    | 9 (30%)  |    | 1 (3%)   |    | 11 (33%) |
|              | Moderate |    | 1 (3%)   |    | 4 (12%)  |    | 7 (21%)  |
|              | Severe   |    | 18 (60%) |    | 2 (6%)   |    | 6 (18%)  |
| Work         | No       | 19 | 1 (5%)   | 23 | 18 (78%) | 23 | 9 (39%)  |
|              | Mild     |    | 4 (21%)  |    | 0 (0%)   |    | 4 (17%)  |
|              | Moderate |    | 3 (16%)  |    | 2 (9%)   |    | 4 (17%)  |
|              | Severe   |    | 11 (58%) |    | 3 (13%)  |    | 6 (26%)  |
| Sports       | No       | 16 | 1 (6%)   | 18 | 14 (78%) | 17 | 6 (35%)  |

|          |          |         |         |
|----------|----------|---------|---------|
| Mild     | 4 (25%)  | 1 (6%)  | 7 (41%) |
| Moderate | 1 (6%)   | 0 (0%)  | 0 (0%)  |
| Severe   | 10 (63%) | 3 (17%) | 4 (24%) |

---

Data are shown as N (%). N represents the number of patients for whom data were available.

No pain, NRS 0; Mild pain, NRS 1-3; Moderate pain, NRS 4-6; Severe pain , NRS 7-10

NRS, numeric rating scale.

**Online Resource 3. Satisfaction reported at final follow-up for the entire study population**

---

|                           | <b>Functional<br/>result<br/><br/>(n=36)</b> | <b>Cosmetic<br/>result<br/><br/>(n=34)</b> | <b>Work<br/>resumption<br/><br/>(n=22)</b> | <b>Sports and<br/>activity<br/>resumption<br/><br/>(n=23)</b> | <b>Decision for<br/>surgery<br/><br/>(n=35)</b> |
|---------------------------|----------------------------------------------|--------------------------------------------|--------------------------------------------|---------------------------------------------------------------|-------------------------------------------------|
| Very dissatisfied (NRS 0) | 0 (0%)                                       | 0 (0%)                                     | 0 (0%)                                     | 1 (4%)                                                        | 3 (9%)                                          |
| Dissatisfied (NRS 1-3)    | 5 (14%)                                      | 2 (6%)                                     | 0 (0%)                                     | 2 (9%)                                                        | 1 (3%)                                          |
| Satisfied (NRS 4-6)       | 4 (11%)                                      | 5 (15%)                                    | 7 (32%)                                    | 5 (22%)                                                       | 6 (17%)                                         |
| Very satisfied (NRS 7-10) | 27 (75%)                                     | 27 (79%)                                   | 15 (68%)                                   | 15 (65%)                                                      | 25 (71%)                                        |

---

Data are shown as N (%). N represents the number of patients for whom data were available.

NRS, numeric rating scale.
